# Supplementary material
Source: PubMed Central journal article supplement (PMC4212784)
Supplement: nn5042625_si_001.pdf [file nn5042625_si_001.pdf]

## Supporting Information for

# Functional Gold Nanoparticles as Potent Antimicrobial Agents against Multi-Drug-Resistant Bacteria

Xiaoning Li,<sup>a</sup> Sandra M. Robinson,<sup>b</sup> Akash Gupta,<sup>a</sup> Krishnendu Saha,<sup>a</sup> Ziwen Jiang,<sup>a</sup> Daniel F. Moyano,<sup>a</sup> Ali Sahar,<sup>a</sup> Margaret A. Riley,<sup>b</sup> and Vincent M. Rotello<sup>b,\*</sup>

a. Department of Chemistry, b. Biology Department, University of Massachusetts, 710 North Pleasant Street, Amherst, USA.

\*Corresponding author. E-mail: [rotello@chem.umass.edu](mailto:rotello@chem.umass.edu).

### Nanoparticles synthesis

2 nm diameter gold nanoparticles were synthesized by the Brust-Schiffrin two-phase methodology<sup>1</sup> using pentanethiol as the stabilizer; these clusters were purified with successive extractions with ethanol and acetone. A Murray place exchange reaction<sup>2</sup> was carried out in dry DCM to functionalize the nanoparticles with each ligand.<sup>3, 4</sup> The monolayer-protected nanoparticles were redispersed in water and the excesses of ligand/pentanethiol were removed by dialysis using a 10,000 MWCO snake-skin membrane. The final concentration was measured by UV spectroscopy on a Molecular Devices SpectraMax M2 at 506nm according to the reported methodology.<sup>5</sup>

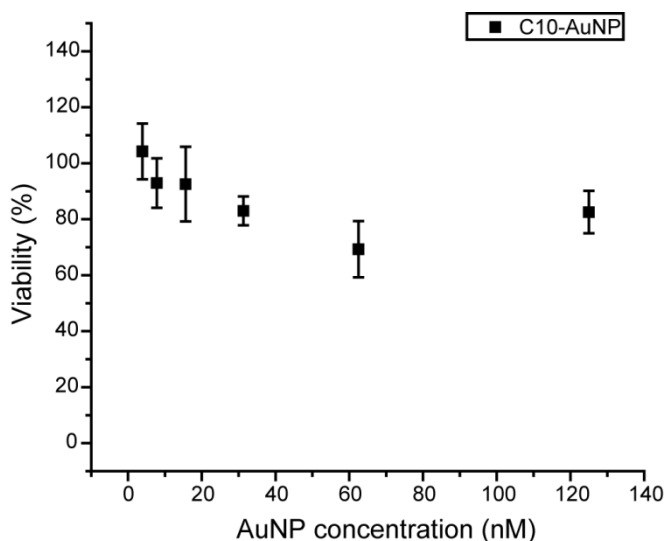

Figure S1. Viability of 3T3 mammalian cells after incubation with NP 3 (C10-AuNP) at different concentrations.

*E. coli* + C10-AuNP

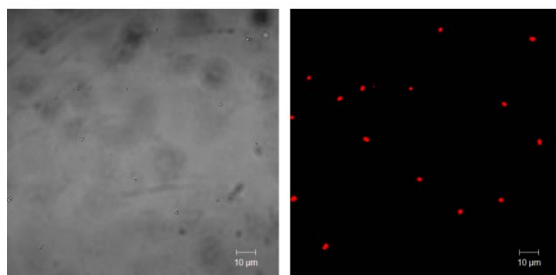

*S. aureus* (MRSA) + C10-AuNP

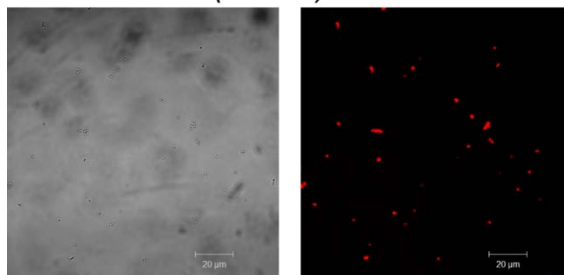

Figure S2. PI staining showing NP 3 (C10-AuNP)-induced bacterial cell membrane damage. Scale bar is 20 µm.

Table S1. Uropathogenic *E. coli* strain information. All strains were harvested and tested for susceptibility in Cooley Dickinson Hospital Microbiology Laboratory (Northampton, MA). S: Susceptible; I: Intermediate; R: Resistant.

|                        | Riley Strain Name             | CD-2           | CD-3           | CD-19                                                            | CD-496         | CD-549         |
|------------------------|-------------------------------|----------------|----------------|------------------------------------------------------------------|----------------|----------------|
|                        | <b>Species</b>                | <i>E. coli</i> | <i>E. coli</i> | <i>E. coli</i>                                                   | <i>E. coli</i> | <i>E. coli</i> |
|                        | <b>Date Isolated</b>          | 9/11/2011      | 9/11/2011      | 9/12/2011                                                        | 1/3/12         | 1/9/12         |
|                        | <b>Specimen</b>               | UCC            | UCC            | UCC                                                              | UCC            | UCC            |
|                        | <b>Cfu/ml</b>                 | >100,000       | >100,000       | >100,000                                                         | >100,000       | >100,000       |
|                        | <b>Note</b>                   |                |                | 2 morphologies of <i>E. coli</i> with different susceptibilities |                |                |
| <b>Aminoglycosides</b> | <b>Amikacin (Amikin)</b>      |                | S              |                                                                  |                | S              |
|                        | <b>Gentamicin (Garamycin)</b> | S              | R              | S                                                                | S              | R              |
|                        | <b>Kanamycin High Level</b>   |                |                |                                                                  |                |                |

|                      |                                         |   |   |   |   |   |
|----------------------|-----------------------------------------|---|---|---|---|---|
|                      | <b>Tobramycin (Nebcin)</b>              |   | I |   |   | R |
| <b>β-Lactam</b>      | <b>Ampicillin (Omnipen, Polycillin)</b> | R | R | R | R | R |
|                      | <b>Ampicillin/sulbactam (Unasyn)</b>    | I | I | R | I | R |
|                      | <b>Amoxicillin/CA (Augmentin)</b>       |   |   |   |   | I |
|                      | <b>Aztreonam (Zithromax)</b>            |   |   |   |   | R |
|                      | <b>Oxacillin (Prostaphlin)</b>          |   |   |   |   |   |
|                      | <b>Penicillin</b>                       |   |   |   |   |   |
|                      | <b>Piperacillin (Pipracil)</b>          |   |   |   |   | R |
|                      |                                         |   |   |   |   |   |
| <b>Cephalosporin</b> | <b>Ceftazidime (Fortaz, Tazicef)</b>    |   |   |   |   |   |
|                      | <b>Cefaclor (Ceclor, Ceclor CD)</b>     |   |   |   |   | R |
|                      | <b>Ceftriaxone (Rocephin)</b>           | S | S | S | S | R |
|                      | <b>Cefotaxime</b>                       |   |   |   |   |   |
|                      | <b>Cefazolin (Ancef, Kefzol)</b>        | S | S | I | R | R |
|                      | <b>Ceftizoxime</b>                      |   |   |   |   | R |
|                      | <b>Cefepime (Maxipime)</b>              | S | S | S | S | R |
|                      | <b>Cefoxitin (Mefoxin)</b>              | S | S | S | S | R |
|                      | <b>Cefuroxime-Sodium</b>                |   |   |   |   |   |
|                      | <b>Cefuroxime-Axetil (Ceftin)</b>       |   |   |   |   | R |
| <b>Carbapenem</b>    | <b>Ertapenem</b>                        |   |   |   |   |   |
|                      | <b>Imipenem (Primaxin)</b>              |   |   |   | S | S |
|                      | <b>Meropenem (Merrem)</b>               |   |   |   |   |   |

|                                  |                                      |   |   |   |   |   |
|----------------------------------|--------------------------------------|---|---|---|---|---|
| <b>Microlides</b>                | <b>Azithromycin (Azactam)</b>        |   |   |   |   |   |
|                                  | <b>Erythromycin</b>                  |   |   |   |   |   |
| <b>Fluoroquinolone</b>           | <b>Ciprofloxacin (Cipro)</b>         | S | S | R | S | R |
|                                  | <b>Levofloxacin (Levaquin)</b>       | S | S | R | S | R |
|                                  | <b>Ofloxacin (Floxin)</b>            |   |   |   |   |   |
| <b>Lincosamides</b>              | <b>Clindamycin (Cleocin)</b>         |   |   |   |   |   |
| <b>Oxazolidinones</b>            | <b>Linezolid (Zyvox)</b>             |   |   |   |   |   |
| <b>Antimycobacterials</b>        | <b>Rifampin (Rifadin, Rimactane)</b> |   |   |   |   |   |
| <b>Folate pathway inhibitors</b> | <b>Trimethoprim/Sulfa (Gantanol)</b> | S | R | S | S | R |
| <b>Tetracycline</b>              | <b>Tetracycline</b>                  |   |   |   |   | R |
| <b>Glycylcyclines</b>            | <b>Tigecycline</b>                   |   |   |   |   | S |
| <b>Glycopeptides</b>             | <b>Vancomycin (Vancocin)</b>         |   |   |   |   |   |

Table S2. Uropathogenic *E. cloacae* complex, *P. aeruginosa*, and *S. aureus* strain information. All strains were harvested and tested for susceptibility in Cooley Dickinson Hospital Microbiology Laboratory (Northampton, MA). S: Susceptible; I: Intermediate; R: Resistant.

|  | <b>Riley Strain Name</b> | CD-866                    | CD-1412                   | CD-1545                   | CD-1006              | CD-23                | CD-1578          | CD-489                  |
|--|--------------------------|---------------------------|---------------------------|---------------------------|----------------------|----------------------|------------------|-------------------------|
|  | <b>Species</b>           | <i>E. cloacae</i> complex | <i>E. cloacae</i> complex | <i>E. cloacae</i> complex | <i>P. aeruginosa</i> | <i>P. aeruginosa</i> | <i>S. aureus</i> | <i>S. aureus</i> - MRSA |
|  | <b>Date Isolated</b>     | 3/29/12                   | 6/7/12                    | 6/19/2012                 | 4/23/12              | 9/12/2011            | 6/21/2012        | 1/3/12                  |
|  | <b>Specimen</b>          | UCC                       | UCC                       | UCC                       | UCC                  | UCI                  | UCC              | UCS                     |
|  | <b>Cfu/ml</b>            | 10-100,000                | >100,000                  | >100,000                  | >100,000             | >100,000             | MODERATE         | >100,000                |

|                 | Note                             |   | Urine from nephrostomy tube |   |   | Extended panel of susceptibilities for the P. aeruginosa |   |   |
|-----------------|----------------------------------|---|-----------------------------|---|---|----------------------------------------------------------|---|---|
| Aminoglycosides | Amikacin (Amikin)                |   | S                           | S |   |                                                          |   |   |
|                 | Gentamicin (Garamycin)           | S | I                           | I | S | I                                                        | S | S |
|                 | Kanamycin High Level             |   |                             |   |   |                                                          |   |   |
|                 | Tobramycin (Nebcin)              |   | R                           | R |   | S                                                        |   |   |
| β-Lactam        | Ampicillin (Omnipen, Polycillin) |   |                             |   | S | R                                                        |   |   |
|                 | Ampicillin/sulbactam (Unasyn)    |   |                             |   | S | R                                                        | S | R |
|                 | Amoxicillin/CA (Augmentin)       |   |                             |   |   | R                                                        | S | R |
|                 | Aztreonam (Zithromax)            |   |                             |   |   |                                                          |   |   |
|                 | Oxacillin (Prostaphlin)          |   |                             |   |   |                                                          | S | R |
|                 | Penicillin                       |   |                             |   |   |                                                          | R | R |
|                 | Piperacillin (Pipracil)          |   |                             |   |   | S                                                        |   |   |
| Cephalosporin   | Ceftazidime (Fortaz, Tazicef)    |   |                             |   |   |                                                          |   |   |
|                 | Cefaclor (Ceclor, Ceclor CD)     |   |                             |   |   |                                                          | S | R |
|                 | Ceftriaxone (Rocephin)           | S | S                           | S | S | R                                                        | S | R |
|                 | Cefotaxime                       |   |                             |   |   |                                                          | S | R |
|                 | Cefazolin (Ancef, Kefzol)        | R | R                           | R | S | R                                                        |   |   |
|                 | Ceftizoxime                      |   |                             |   |   | R                                                        |   |   |

|                                      |                                               |   |   |   |   |   |   |   |
|--------------------------------------|-----------------------------------------------|---|---|---|---|---|---|---|
|                                      | <b>Cefepime<br/>(Maxipime)</b>                | S | S | S | S | I |   |   |
|                                      | <b>Cefoxitin<br/>(Mefoxin)</b>                | R | R | R | S | R |   |   |
|                                      | <b>Cefuroxime-<br/>Sodium</b>                 |   |   |   |   |   | S | R |
|                                      | <b>Cefuroxime-<br/>Axetil (Ceftin)</b>        |   |   |   |   | R |   |   |
| <b>Carbapenem</b>                    | <b>Ertapenem</b>                              |   |   |   |   |   |   |   |
|                                      | <b>Imipenem<br/>(Primaxin)</b>                | S |   |   | S | S | S | R |
|                                      | <b>Meropenem<br/>(Merrem)</b>                 |   |   |   |   |   |   |   |
| <b>Microlides</b>                    | <b>Azithromycin<br/>(Azactam)</b>             |   |   |   |   |   | R |   |
|                                      | <b>Erythromycin</b>                           |   |   |   |   |   | R |   |
| <b>Fluoroquinolone</b>               | <b>Ciprofloxacin<br/>(Cipro)</b>              | S | S | R | S | R |   |   |
|                                      | <b>Levofloxacin<br/>(Levaquin)</b>            | S | S | R | S | R | S | R |
|                                      | <b>Ofloxacin<br/>(Floxin)</b>                 |   |   |   |   |   |   |   |
| <b>Lincosamides</b>                  | <b>Clindamycin<br/>(Cleocin)</b>              |   |   |   |   |   | R |   |
| <b>Oxazolidinones</b>                | <b>Linezolid<br/>(Zyvox)</b>                  |   | S | S |   |   | S | S |
| <b>Antimycobacterials</b>            | <b>Rifampin<br/>(Rifadin,<br/>Rimactane)</b>  |   |   |   |   |   | S | S |
| <b>Folate pathway<br/>inhibitors</b> | <b>Trimethoprim/<br/>Sulfa<br/>(Gantanol)</b> | S | R | R | S | R | S | S |
| <b>Tetracycline</b>                  | <b>Tetracycline</b>                           |   |   |   |   | R | S | S |
| <b>Glycylcyclines</b>                | <b>Tigecycline</b>                            |   |   |   |   |   |   |   |
| <b>Glycopeptides</b>                 | <b>Vancomycin<br/>(Vancocin)</b>              |   |   |   |   |   | S | S |

---

<sup>1</sup> Brust, M.; Walker, M.; Bethell, D.; Schiffrin, D. J.; Whyman, R. Synthesis of Thiol-derivatised Gold Nanoparticles in A Two-Phase Liquid-Liquid System. *J. Chem. Soc., Chem. Commun.* **1994**, 7, 801-802.

<sup>2</sup> Templeton, A. C.; Wuelfing, M. P.; Murray, R. W. Monolayer Protected Cluster Molecules. *Acc. Chem. Res.* **2000**, 33, 27-36.

<sup>3</sup> Miranda, O. R. *et al.* Enzyme-Amplified Array Sensing of Proteins in Solution and in Biofluids. *J. Am. Chem. Soc.* **2010**, 132, 5285-5289.

<sup>4</sup> De, M. *et al.* Sensing of Proteins in Human Serum Using Conjugates of Nanoparticles and Green Fluorescent protein. *Nat. Chem.* **2009**, 1, 461-465.

<sup>5</sup> Liu, X. O.; Atwater, M.; Wang, J. H.; Huo, Q. Extinction Coefficient of Gold Nanoparticles with Different Sizes and Different Capping Ligands. *Colloid. Surface. B* **2007**, 58, 3-7.
